# Supplementary material for: Modulating the structure and interactions of lipid–peptide complexes by varying membrane composition and solution conditions
Source: Royal Society of Chemistry journal article supplement (doi:10.1039/c3sm00105a), 2013-01-01
Supplement: c3sm00105a.pdf [file c3sm00105a.pdf]

# Modulating the structure and interactions of lipid-peptide complexes by varying membrane composition and solution conditions

Leora Moshe<sup>1,3</sup>, Gadiel Saper<sup>1,2,4</sup>, Or Szekely<sup>1,2,5</sup>, Yaniv Linde<sup>1</sup>, Chaim Gilon<sup>1</sup>, Daniel Harries<sup>1,2,3</sup> and Uri Raviv<sup>1,3,\*</sup>

<sup>1</sup> The institute of Chemistry, The Hebrew University of Jerusalem, Jerusalem, 91904, Israel

<sup>2</sup> The Fritz Haber Research Center, The Hebrew University of Jerusalem, Israel 91904

<sup>3</sup> The Center for Nanoscience and Nanotechnology

<sup>4</sup> Current Address: Technion - Israel Institute of Technology, Haifa, Israel

<sup>5</sup> Current Address: The Weizmann Institute of Science, Rehovot, Israel

\*Corresponding author: uri.raviv@mail.huji.ac.il

## Supporting information

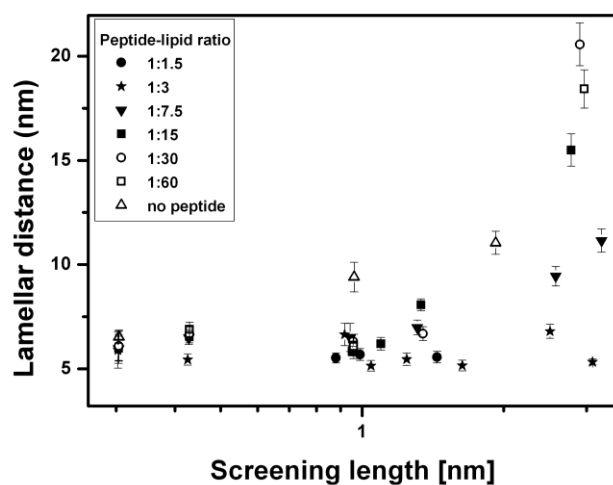

Figure S1: The region of short screening lengths of Figure 4 on an expanded scale. Lamellar repeat distance of the Caco-2 model membrane as a function of the screening length (taking into account both NaCl and peptide concentrations), at a variety of peptide-lipid molar ratios.

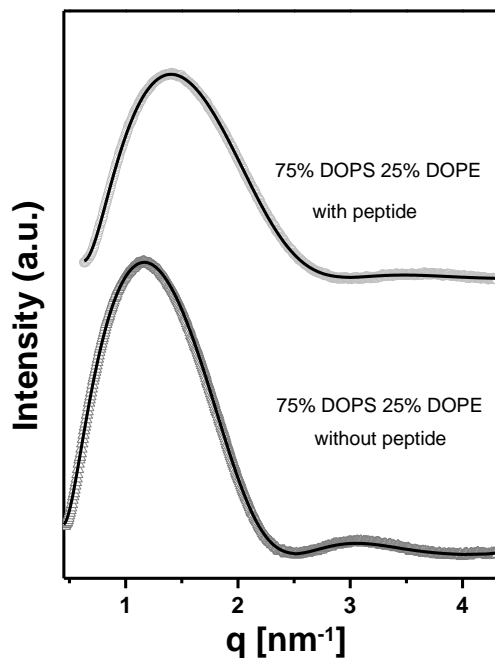

Figure S2. Form factor of 75% DOPS and 25% DOPE membrane with (top) and without (bottom) the peptide at P/L = 1:3. No salt is added. The parameters of the best fitted models (eq. 8) are shown in Table S1.

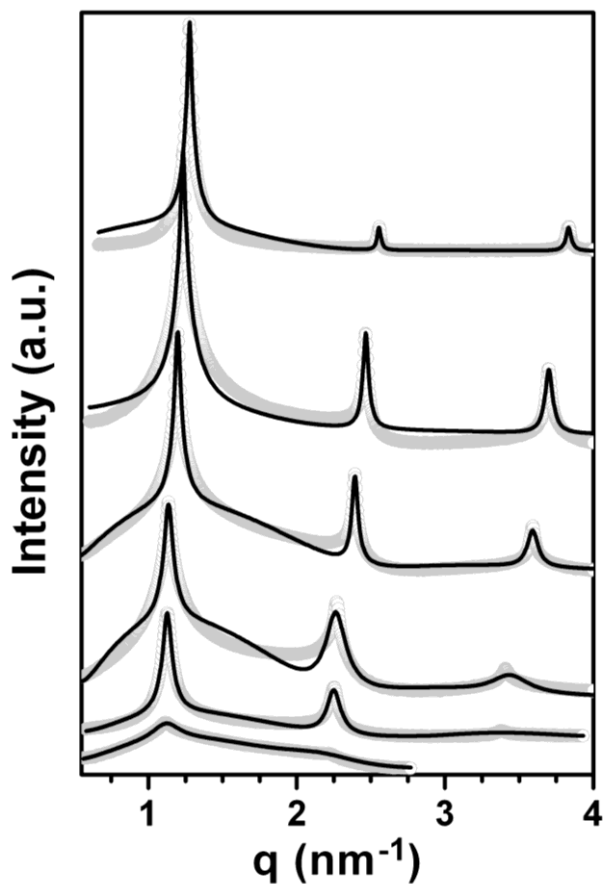

Figure S3. Radially averaged scattering intensities of lipid-peptide complexes at a peptide-lipid molar ratio of 1:3, at different membrane compositions (open symbols). All the membranes contain DOPS molar fraction of 0.15, and the zwitterionic lipids DOPC and DOPE comprise the rest of the membranes. Molar fractions of DOPE from top to bottom: 0.85, 0.7, 0.55, 0.35, 0.15. The very last bottom curve corresponds to 15% DOPS and 85% DOPC. Solid curves corresponds to simulated structure factor (eq. 8), using the best fitted model parameters, shown in Table S1, Figure S4, and Figure S5.

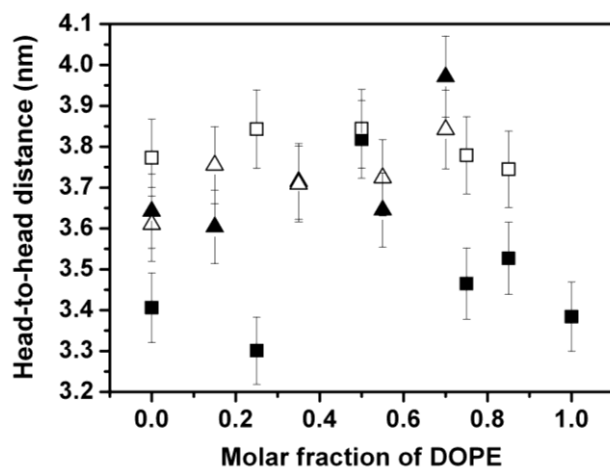

Figure S4. Head to head distance of membrane – peptide complexes as a function of the DOPE molar fraction. Solid symbols correspond to membrane – peptide complexes, peptide to lipid molar ratio, P/L = 1:3, open symbols correspond to the case of no added peptides (i.e. the membranes alone). Square symbols – membranes with DOPE and DOPS only. Triangles – DOPE/DOPS/DOPC membranes with 0.15 molar fraction DOPS, DOPE as indicated in the figure, and the remaining lipid molar fraction is DOPC. Data are also presented in Table S1.

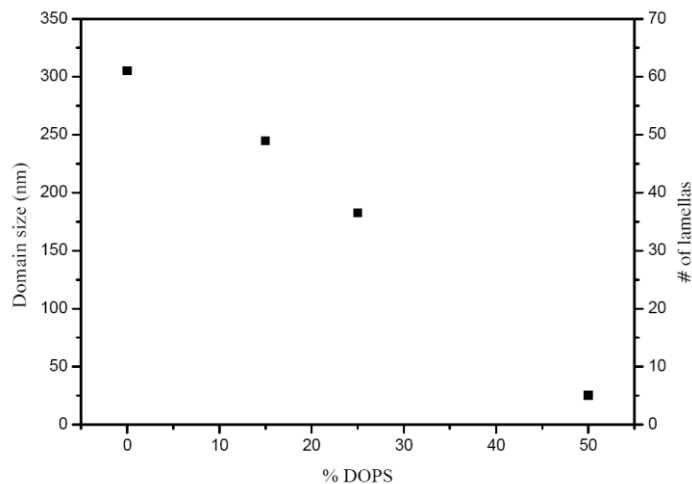

Figure S5. The number of layers in the multi-lamellar phase or domain size as a function of the amount of DOPS in DOPS/DOPE membranes with peptide at P/L of 1:3, based on line-shape analysis of the data in Figure S3.

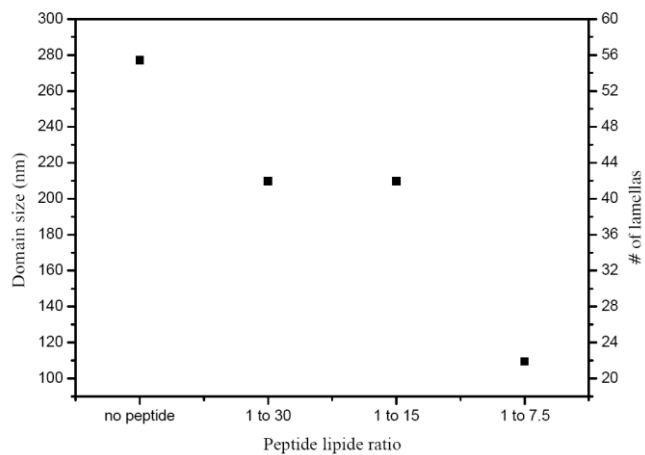

Figure S6. Number of lamellas and domain size as a function of peptide to lipid molar ratio for DOPC membranes, based on line-shape analysis of the data in Figure 8.

Table S1: Length and electron density of the head group, carbon tails and the full head-to-head length of the different membranes. All the data were fit to Eq. 8 using X+. The rows in gray are samples with the peptide at P/L=1:3, the other samples are of membranes with no added peptide. Error in tail length is ~0.5%, error in head size and in electron density is <1.5% and error in head-to-head <2.5%.

|        | Membrane composition |       |       | Carbon tail length (nm) | Head length (nm) | Tail electron density (e/nm <sup>3</sup> ) | Head electron density (e/nm <sup>3</sup> ) | Head-to-head distance (nm) |
|--------|----------------------|-------|-------|-------------------------|------------------|--------------------------------------------|--------------------------------------------|----------------------------|
|        | %DOPS                | %DOPE | %DOPC |                         |                  |                                            |                                            |                            |
| no PEP | 15                   | 0     | 85    | 1.163                   | 1.284            | 271                                        | 388                                        | 3.61                       |
| PEP    | 15                   | 0     | 85    | 1.371                   | 0.9              | 290                                        | 405                                        | 3.642                      |
| no PEP | 50                   | 0     | 50    | 1.115                   | 1.34             | 275                                        | 391                                        | 3.57                       |
| PEP    | 50                   | 0     | 50    | 0.907                   | 1.359            | 267                                        | 403                                        | 3.173                      |
| no PEP | 75                   | 0     | 25    | 1.272                   | 1.336            | 294                                        | 410                                        | 3.88                       |
| PEP    | 75                   | 0     | 25    | 0.989                   | 1.383            | 284                                        | 392                                        | 3.361                      |
| no PEP | 100                  | 0     | 0     | 1.193                   | 1.387            | 276                                        | 411                                        | 3.773                      |
| PEP    | 100                  | 0     | 0     | 1.004                   | 1.398            | 281                                        | 402                                        | 3.406                      |
| no PEP | 15                   | 15    | 70    | 1.157                   | 1.441            | 265                                        | 414                                        | 3.755                      |
| PEP    | 15                   | 15    | 70    | 1.015                   | 1.574            | 288                                        | 385                                        | 3.604                      |
| no PEP | 75                   | 25    | 0     | 1.191                   | 1.461            | 286                                        | 387                                        | 3.843                      |
| PEP    | 75                   | 25    | 0     | 0.96                    | 1.381            | 289                                        | 389                                        | 3.301                      |
| no PEP | 15                   | 35    | 50    | 1.241                   | 1.226            | 278                                        | 399                                        | 3.709                      |
| PEP    | 15                   | 35    | 50    | 1.236                   | 1.243            | 276                                        | 405                                        | 3.715                      |
| no PEP | 50                   | 50    | 0     | 1.193                   | 1.458            | 266                                        | 408                                        | 3.844                      |
| PEP    | 50                   | 50    | 0     | 1.176                   | 1.466            | 295                                        | 402                                        | 3.818                      |
| no PEP | 15                   | 55    | 30    | 1.206                   | 1.312            | 283                                        | 396                                        | 3.724                      |
| PEP    | 15                   | 55    | 30    | 1.073                   | 1.499            | 267                                        | 408                                        | 3.645                      |
| no PEP | 15                   | 70    | 15    | 1.252                   | 1.338            | 277                                        | 403                                        | 3.842                      |

|        |    |     |    |       |       |     |     |       |
|--------|----|-----|----|-------|-------|-----|-----|-------|
| PEP    | 15 | 70  | 15 | 1.312 | 1.347 | 276 | 414 | 3.971 |
| no PEP | 25 | 75  | 0  | 1.201 | 1.377 | 271 | 401 | 3.779 |
| PEP    | 25 | 75  | 0  | 1.09  | 1.285 | 291 | 393 | 3.465 |
| no PEP | 15 | 85  | 0  | 1.174 | 1.397 | 268 | 403 | 3.745 |
| PEP    | 15 | 85  | 0  | 1.029 | 1.469 | 275 | 394 | 3.527 |
| no PEP | 0  | 100 | 0  | 0.916 | 0.974 | 275 | 389 | 2.806 |
| PEP    | 0  | 100 | 0  | 1.205 | 0.974 | 291 | 385 | 3.384 |
| no PEP | 25 | 0   | 75 | 1.16  | 1.329 | 265 | 411 | 3.649 |
